# Supplementary material
Source: publisher figshare collection journal article supplement (https://sage.figshare.com/ndownloader/files/15279335)

**Supplementary material**

**Figure 13**

Longitudinal sonogram of the right kidney. A rounded (7.3mm long x 7.7mm thick), heterogeneously hypoechoic nodule was present in the caudal cortex of the right kidney (between callipers).


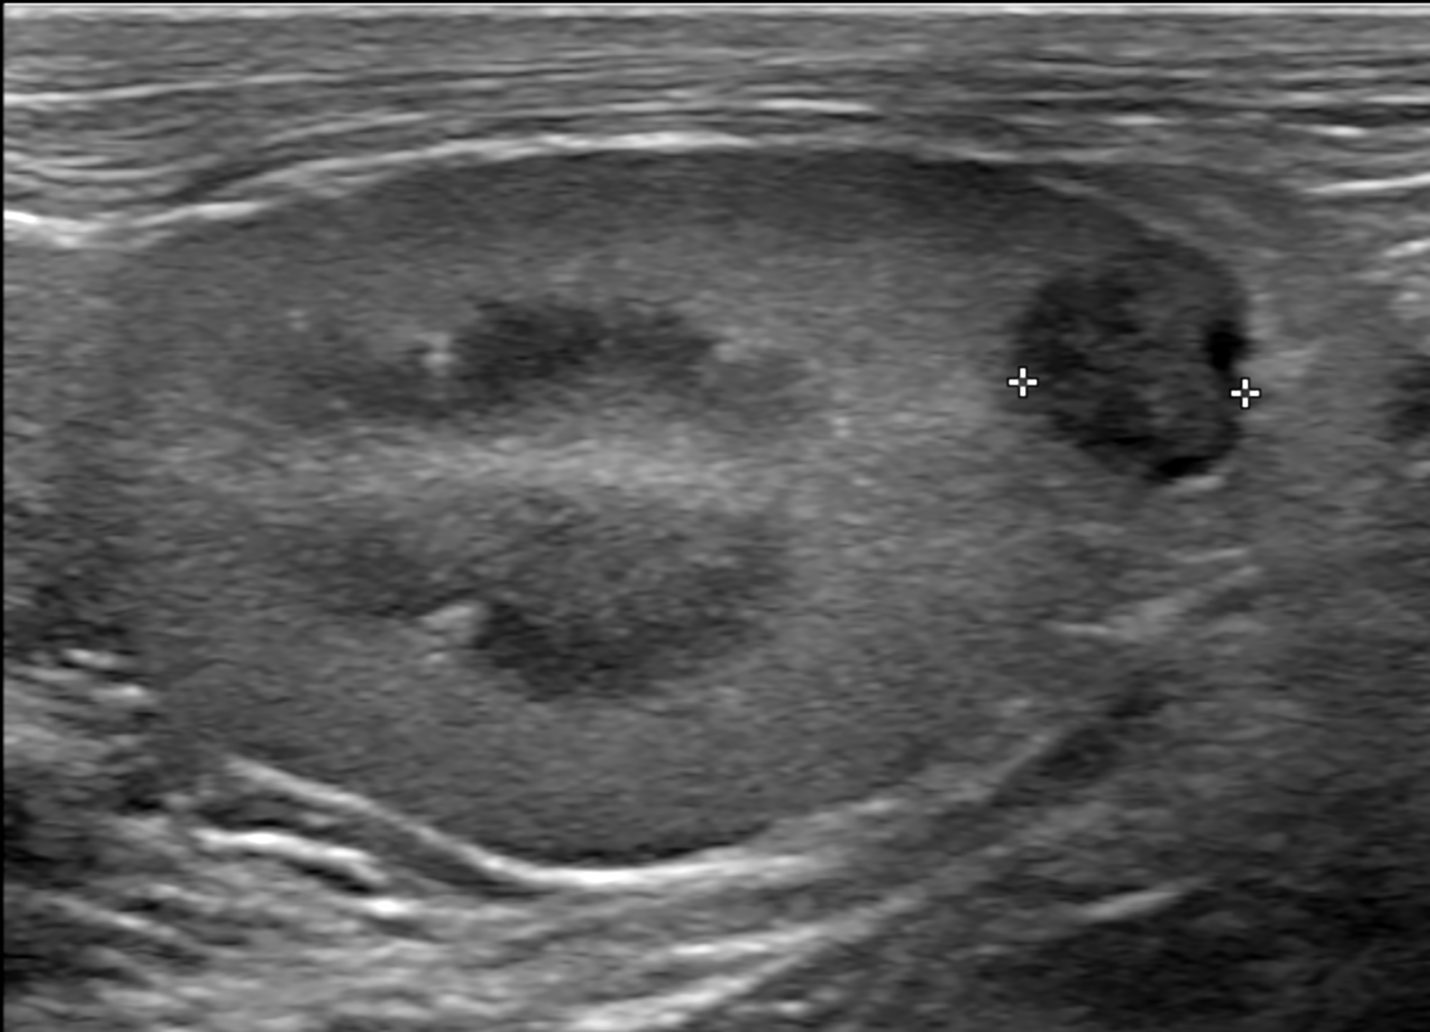


**Figure 14**

Right kidney, cat. Protruding from the kidney is an off-white multilobulated irregular mass which extends through the cortex on section. Bar = 1 cm.

**
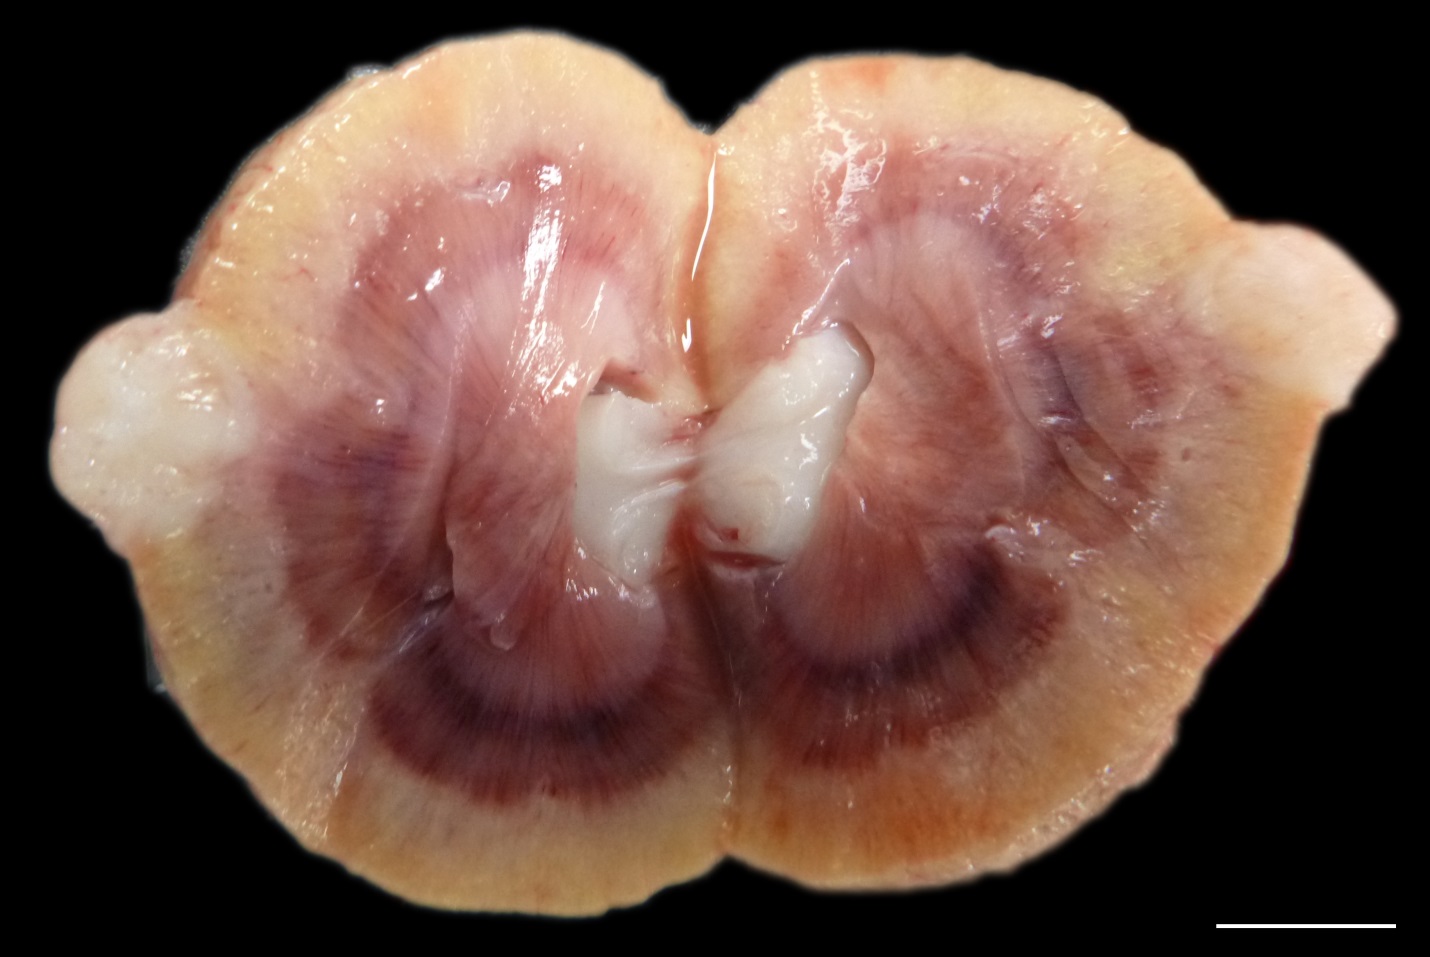
**

**Figure 15**

Left kidney, cat. Note the loss of reniform appearance, with blunting of the left cranial aspect by a smooth pale tan focus. Bar = 1 cm.


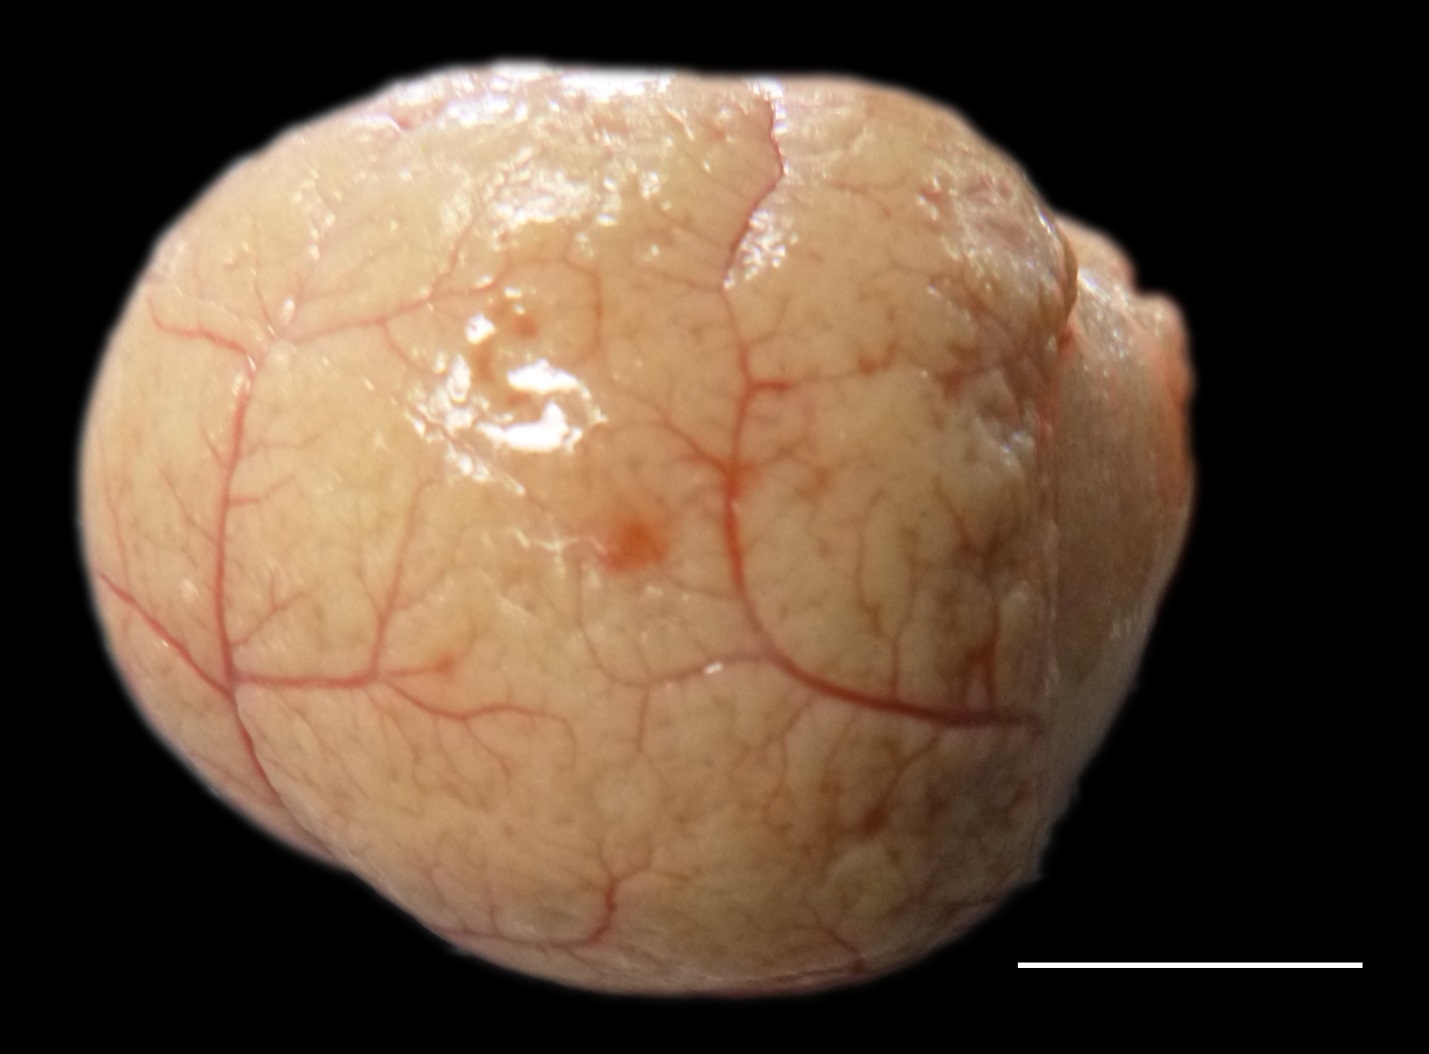


**Figure 16**

Liver, cat. Numerous pale tan firm nodules are peppered across the hepatic serosa.

**
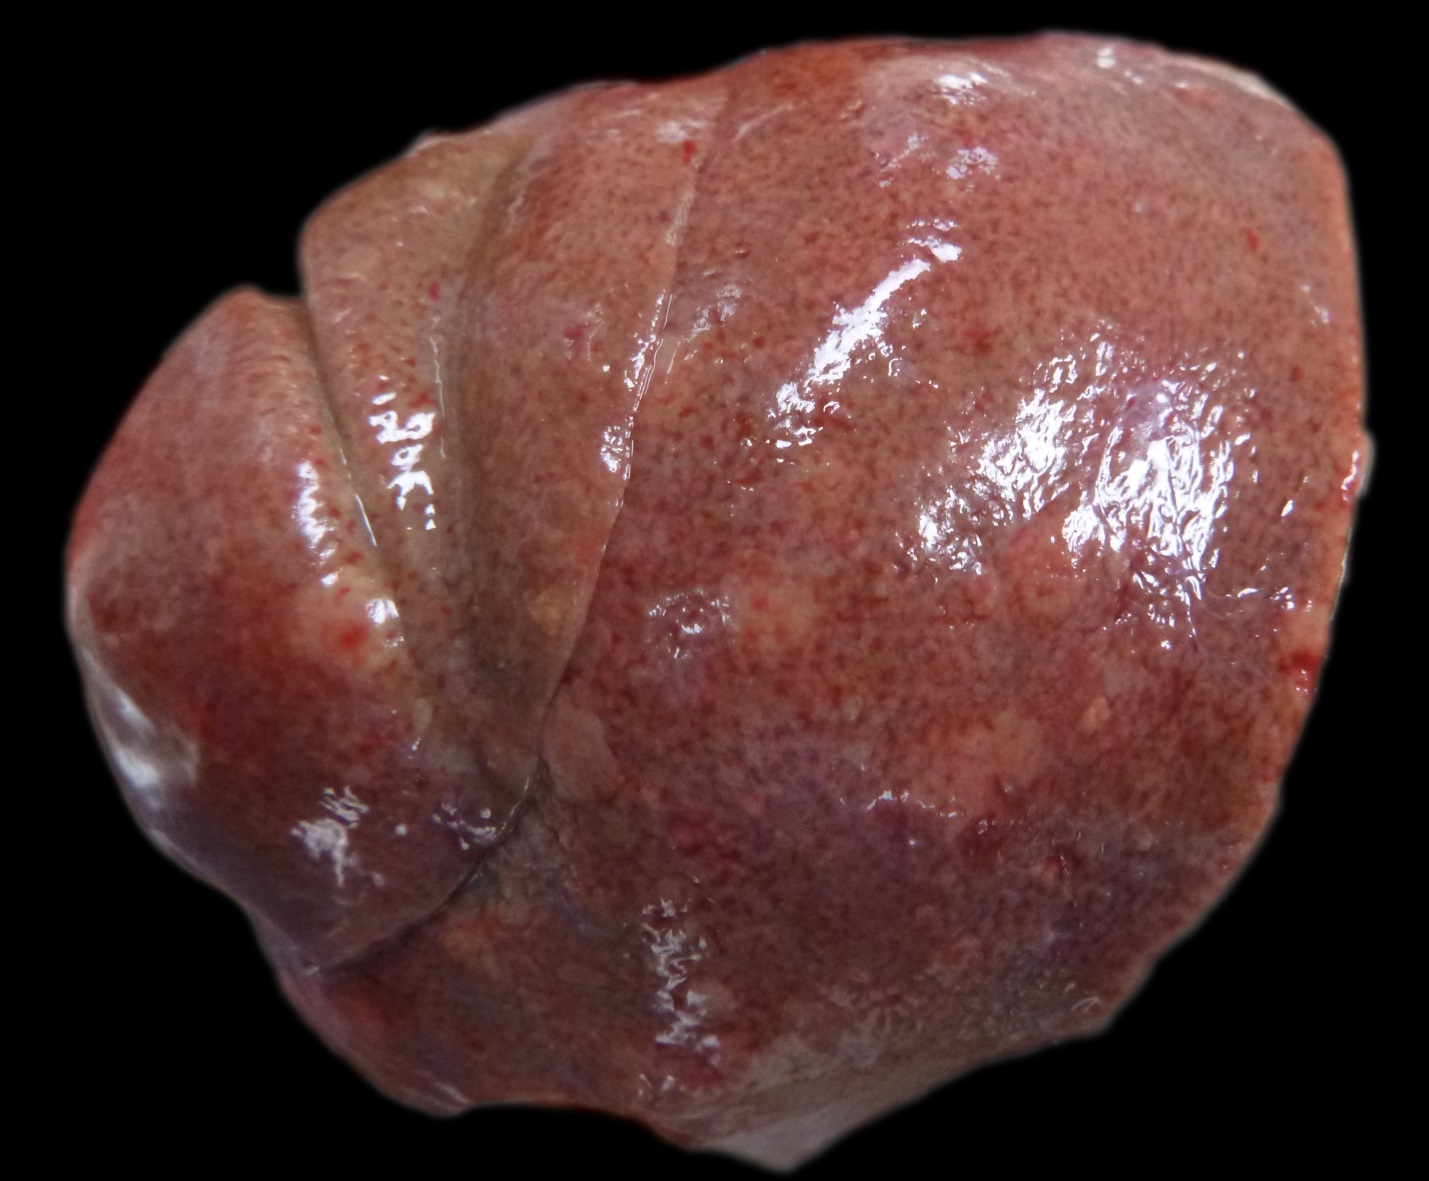
**

**Figure 17**

Renal mass, cat. Neoplastic cells demonstrate similar behavior to the colonic mass (Figure 7). Note the marked anisocytosis and anisokaryosis. 400X. HE.

**
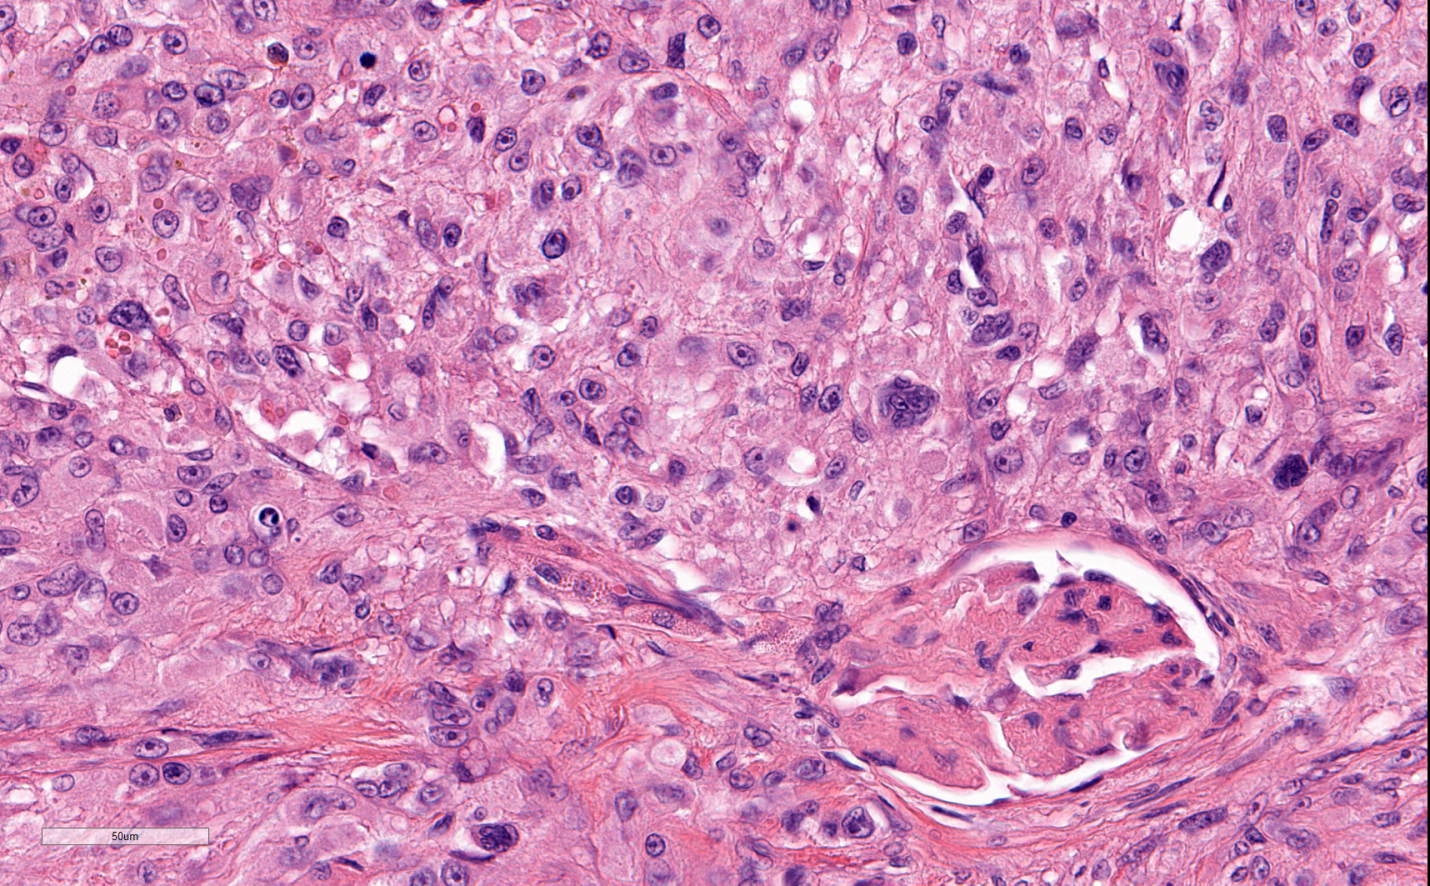
**

**Figure 18**

Renal mass, cat. Neoplastic cells demonstrate diffuse marked nuclear and cytoplasmic labeling for S100. 400X. Peroxidase immunohistochemistry and HE.

**
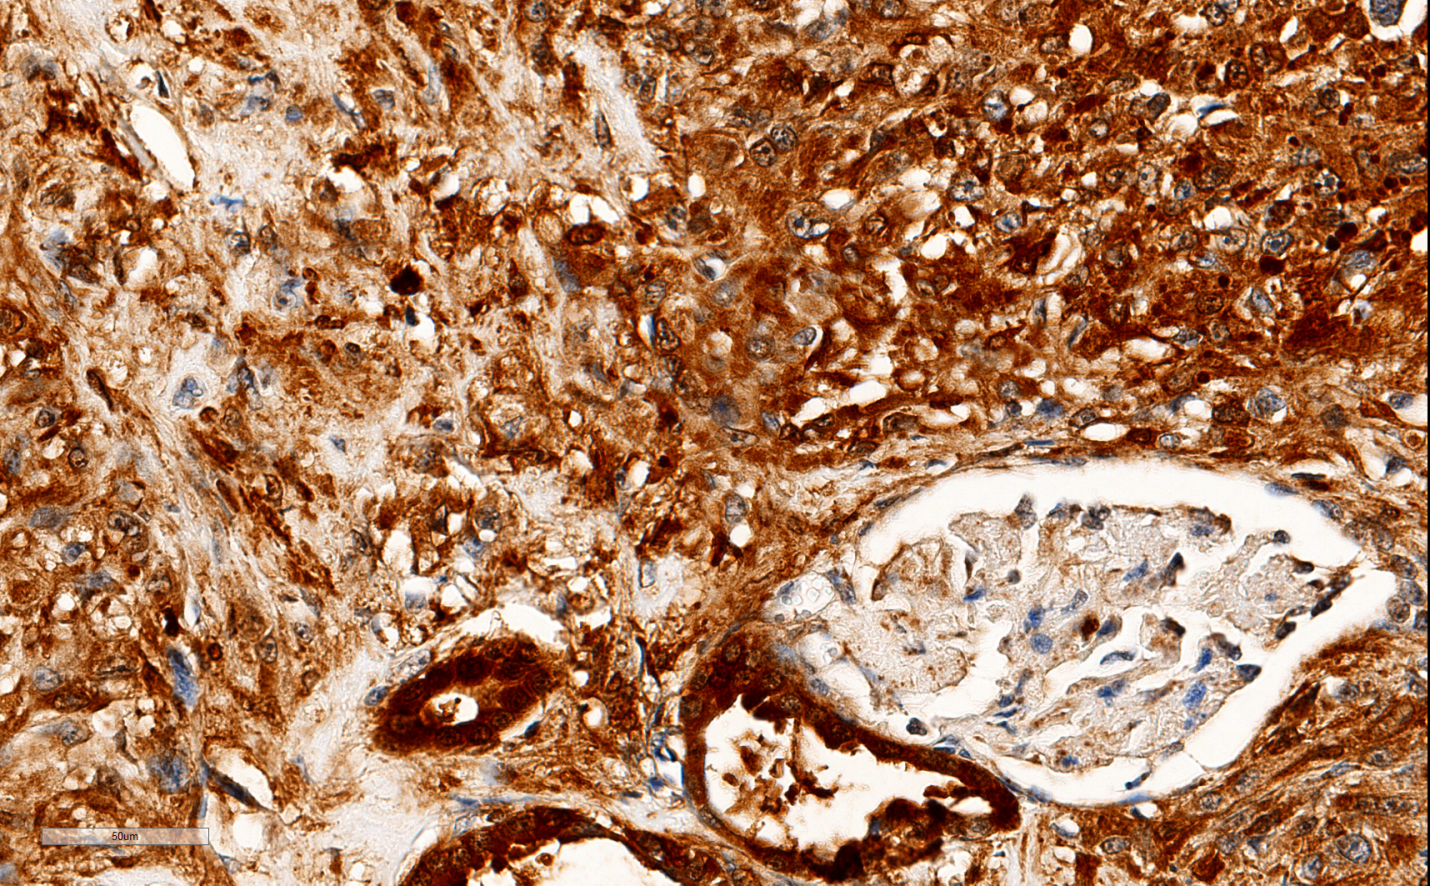
**

**Figure 19**

Renal mass, cat. Neoplastic cells demonstrate diffuse marked cytoplasmic labeling for vimentin. 400X. Peroxidase immunohistochemistry and HE.

**
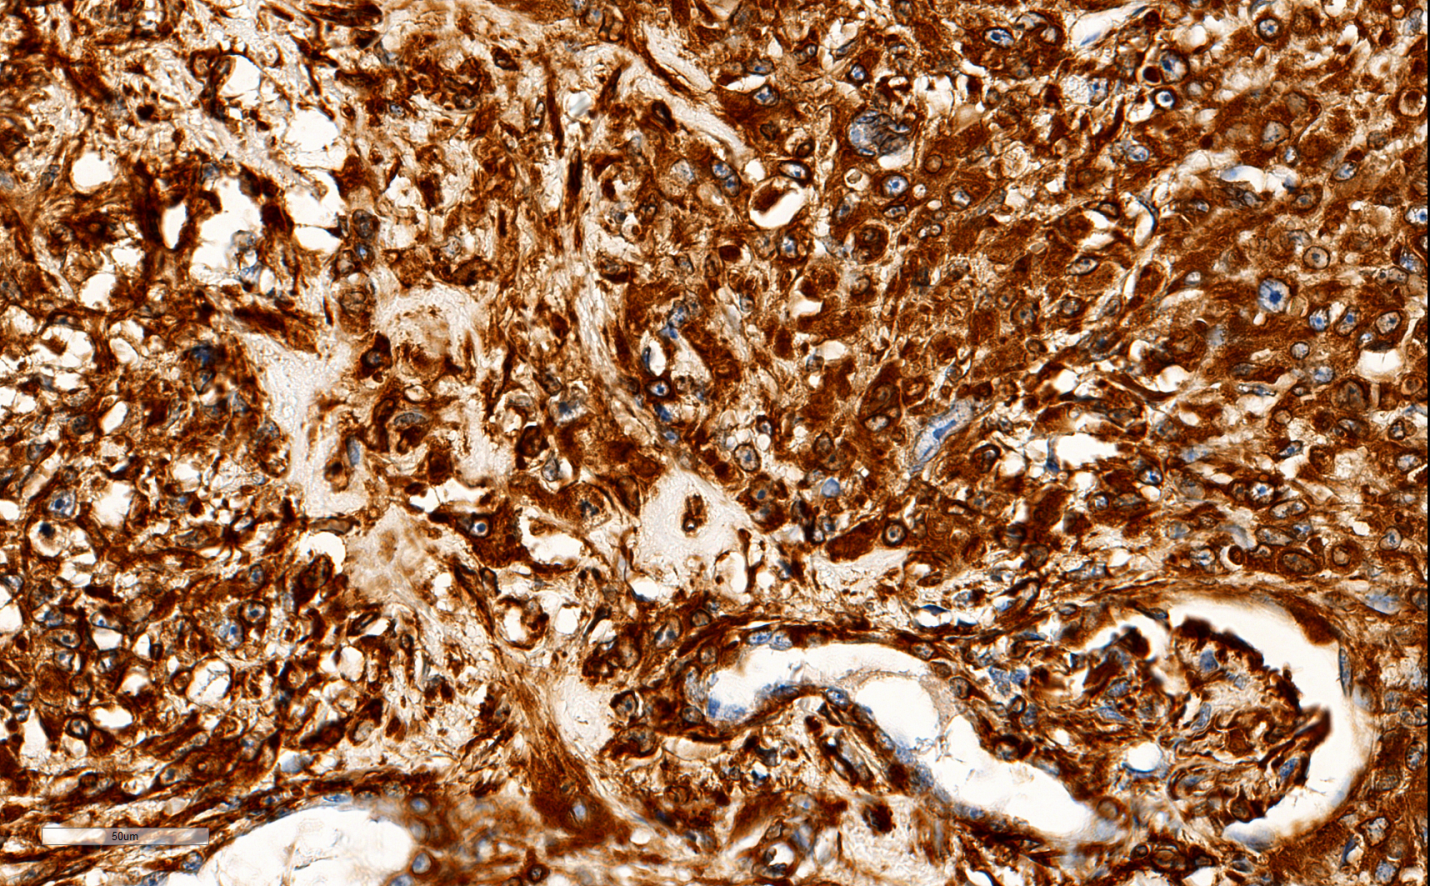
**

**Figure 20**

Renal mass, cat. Neoplastic cells demonstrate scattered faintly positive cytoplasmic labeling for c-kit. 400X. Peroxidase immunohistochemistry and HE.

**
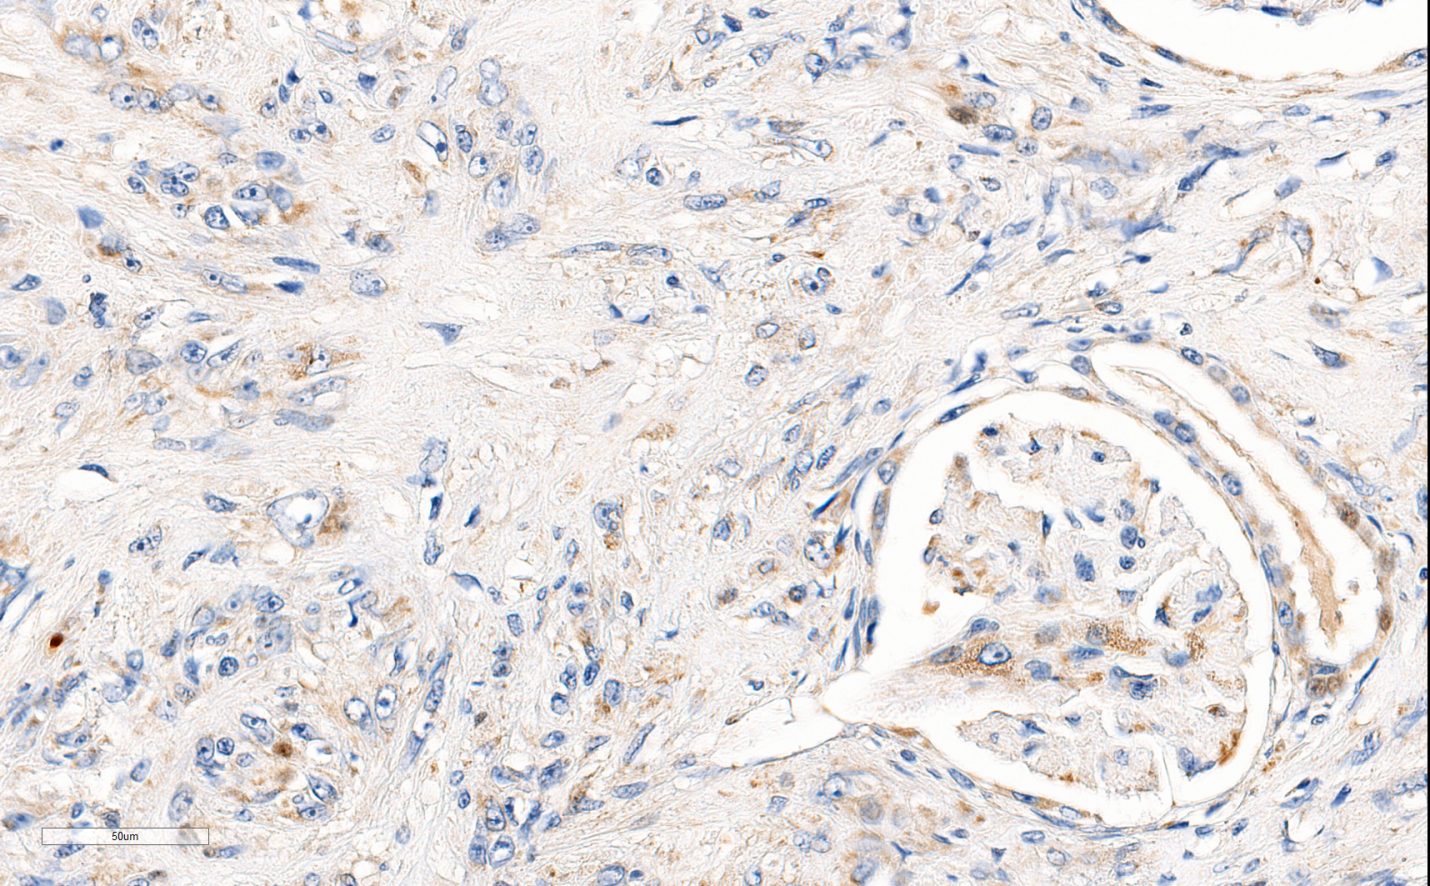
**

**Figure 21**

Renal mass, cat. Neoplastic cells demonstrate diffuse marked cytoplasmic labeling for glial fibrillary acidic protein. 400X. Peroxidase immunohistochemistry and HE.


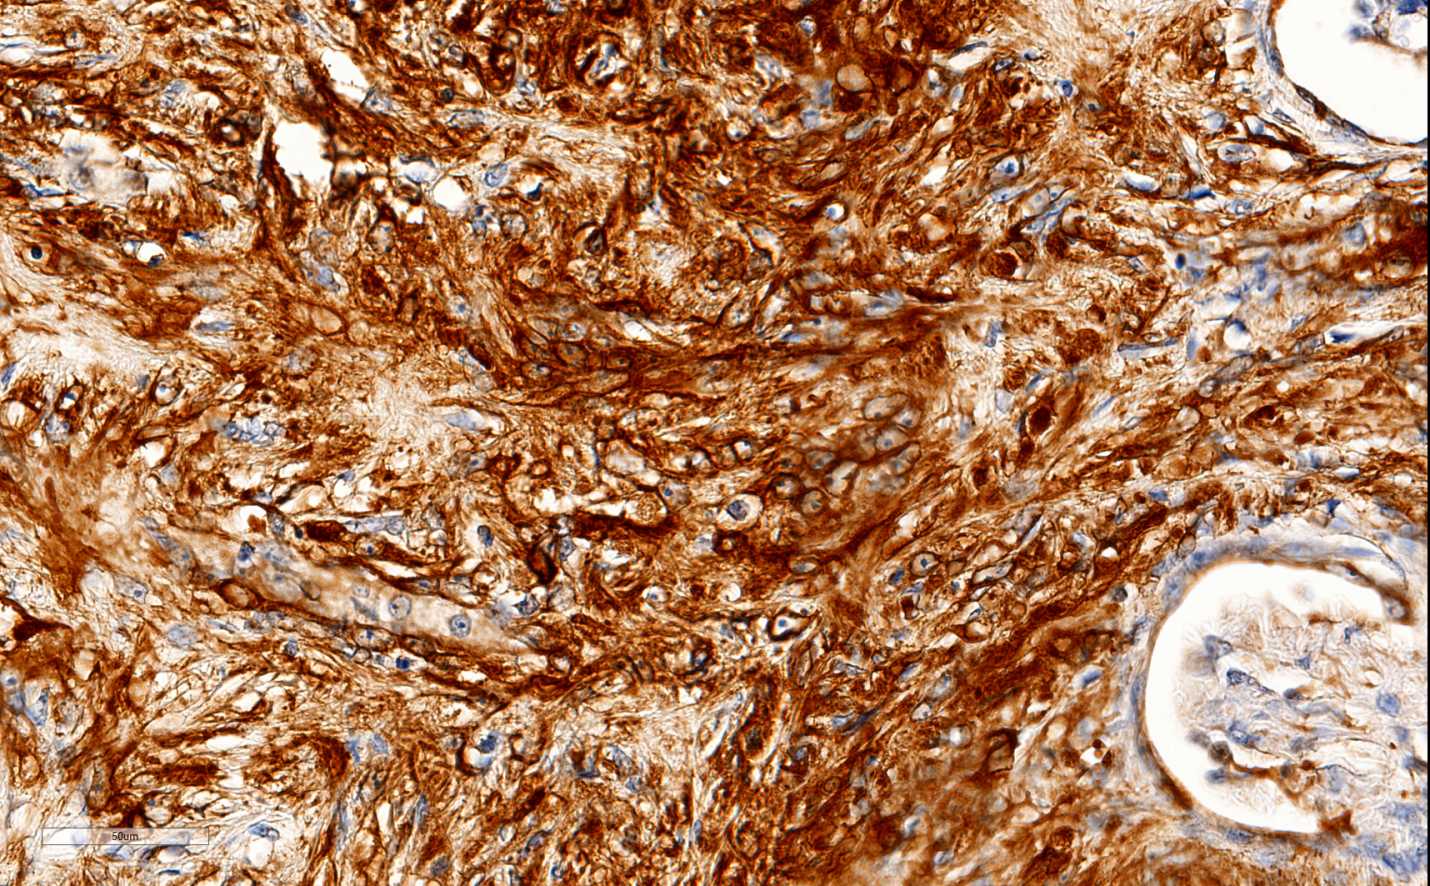

Supplement: Supplementary file 1 [file 15279335]
